# Supplementary material for: An Improved Multi-Objective Optimization and Decision-Making Method on Construction Sites Layout of Prefabricated Buildings
Source: MDPI journal article supplement (doi:10.3390/su15076279), 2023-04-06
Supplement: s1 [file s1]

Archive with 1 entries (1 files):
- sustainability-2272703-supplementary.pdf
