# Supplementary material for: An Improved Multi-Objective Optimization and Decision-Making Method on Construction Sites Layout of Prefabricated Buildings
Source: MDPI journal article supplement (doi:10.3390/su15076279), 2023-04-06
Supplement: s1 [file s1 › sustainability-2272703-supplementary.pdf]

## Expert Consultation Form

### Background information:

Dear experts, this is a consultation on the importance of influencing factors in the arrangement of temporary facilities in the construction site of prefabricated buildings. In this consultation, 16 influencing factors are proposed. Experts are invited to score the importance of the 16 influencing factors based on personal engineering experience and subjective judgment.

### marking criterion:

The scoring range is from 1 to 5, and only whole numbers are allowed, and the meaning of each score is as follows.

- 1: The factor is not important and can be ignored.
- 2: The factor is not important and can be ignored in some cases.
- 3: The factor is important and should be considered.
- 4: The factor is important and needs to be considered in most cases.
- 5: The factor is very important and must be considered.

### Subjects to be evaluated ( 16 questions ):

| Influencing Factors              | Factor Definition                                                                                                                                                             | marks |
|----------------------------------|-------------------------------------------------------------------------------------------------------------------------------------------------------------------------------|-------|
| Economic benefit                 | Costs arising from on-site transportation of components and raw materials and changes in the location of temporary facilities                                                 |       |
| Security risk                    | Potential collision, strike, fall, explosion and other risks may exist                                                                                                        |       |
| Hoisting duration                | Total time spent for Hoisting prefabricated components during construction                                                                                                    |       |
| Smoothness                       | Staff, components and raw materials run smoothly in the site, and the degree of crossover is small                                                                            |       |
| Convenience                      | Smooth access to external transportation materials and easy unloading of materials                                                                                            |       |
| Management efficiency            | Easy site supervision and control by managers                                                                                                                                 |       |
| Work comfort                     | Living facilities and office facilities are far away from the noise and pollution generated by the construction, and the staff can easily communicate with the outside world. |       |
| Spatial conflict                 | Avoid conflicts between the transportation of machinery and equipment, components and raw materials and the working space of staff during the construction process            |       |
| Spatial adjustability            | Low difficulty in adjusting the construction site space when new temporary facilities are built or moved at the construction site                                             |       |
| Stacking rationality             | Prefabricated components storage area to implement zoning management, facilities dedicated site, and other construction materials, equipment shall not be mixed stacking      |       |
| Natural condition                | The influence of topography, weather, temperature and other natural factors on the layout                                                                                     |       |
| Site utilization rate            | Construction facility footprint/construction site area                                                                                                                        |       |
| Surrounding environmental impact | Noise and dust generated during the construction process adversely affects the surrounding environment                                                                        |       |
| Noise control                    | Pollution level of noise source to the whole construction site                                                                                                                |       |
| Aesthetic requirement            | Construction site layout is neat and beautiful                                                                                                                                |       |
| Property protection              | Ensure the safety of the construction site property, theft prevention                                                                                                         |       |

**This consultation has ended. Thank you for your help.**
